# Supplementary material for: DrosophilaCAF-1 regulates HP1-mediated epigenetic silencing and pericentric heterochromatin stability
Source: Oxford University Press journal article supplement (doi:10.1242/jcs.063610), 2010-07-28
Supplement: jcs063610tables1.pdf [file jcs063610tables1.pdf]

**Table S1. Penetrance of the genetic interactions between *CAF-1 p180* and the *lethal 2* group of genes**

| <b>Genotype</b>                                        | <b>Penetrance<sup>a</sup> (%)</b> |
|--------------------------------------------------------|-----------------------------------|
| <i>+/+;;1-166-37/In(3L)C90</i>                         | <b>3</b>                          |
| <i>+/+;;72/In(3L)C90</i>                               | <b>14</b>                         |
| <i>dCAF-1-p180<sup>270</sup>/+;; In(3L)C90/+</i>       | <b>0</b>                          |
| <i>dCAF-1-p180<sup>270</sup>/+;;1-166-37/In(3L)C90</i> | <b>36</b>                         |
| <i>dCAF-1-p180<sup>270</sup>/+;;72/In(3L)C90</i>       | <b>38</b>                         |

<sup>a</sup> The percentage represents the actual ratio of each genotype, which is calculated as the observed number of a given genotype divided by the expected number of the genotype.
