# Supplementary material for: DrosophilaCAF-1 regulates HP1-mediated epigenetic silencing and pericentric heterochromatin stability
Source: Oxford University Press journal article supplement (doi:10.1242/jcs.063610), 2010-07-28
Supplement: jcs063610tables2.pdf [file jcs063610tables2.pdf]

**Table S2. List of oligonucleotides used in this study**

| Name                                    | Sequence                          |
|-----------------------------------------|-----------------------------------|
| <b>ChIP primers</b>                     |                                   |
| rDNA F                                  | 5'-CATTAACGTTATACGGGCCTG-3'       |
| rDNA R                                  | 5'-GCGAAAAGAAAACAGTTCAGC-3'       |
| A F                                     | 5'-CTGGCCCCCATTTACGCTG-3'         |
| A R                                     | 5'-AGACAAAAGGAGATGAGGCG-3'        |
| B F                                     | 5'-CATATGTCACACTCACACTCACACATG-3' |
| B R                                     | 5'-GAACACGAAAAATTGAAACGATGC-3'    |
| C (white) F                             | 5'-ACAGGTGTTGGCCGTTGTGC-3'        |
| C (white) R                             | 5'-CATATCCCGGGCTACTTTGC-3'        |
| D F                                     | 5'-TGGGGAAAAGCCACTTGCAGG-3'       |
| D R                                     | 5'-TCTCCATGTGGGACTACG-3'          |
| E F                                     | 5'-AGATGTCAGACAGGGACAGC-3'        |
| E R                                     | 5'-CCAGTTCGTGTTTGCTATCTG-3'       |
| actin F                                 | 5'-CCTCGTTCTTGGGAATGG-3'          |
| actin R                                 | 5'-CGGTGTTGGCATAACAGATCCT-3'      |
| <b>Real-time RT-PCR primers</b>         |                                   |
| Realtime-concertina-F                   | 5'-GATTCAACGGCTAGCTACACCTG-3'     |
| Realtime-concertina-R                   | 5'-GTCCACCAACATCAACGAACACA-3'     |
| Dbp80-RT-Forward                        | 5'-CGGCATTGACATCGAACAAG-3'        |
| Dbp80-RT-Reverse                        | 5'-CATCCGCATTATCGGTGTTTC-3'       |
| Light-RT-Forward                        | 5'-TGGACGGCATAGTTGACTAC-3'        |
| Light-RT-Reverse                        | 5'-CCACGGTTAACTTCCAAAGG-3'        |
| Realtime-Su(var)2-5-F                   | 5'-CGCAAGGATGAGGAGAAGTCA-3'       |
| Realtime-Su(var)2-5-R                   | 5'-TCCTGAAACGGGAATGGTGTC-3'       |
| Realtime-Su(var)3-9-F                   | 5'-GCAGGACCTCAGCAACTTGA-3'        |
| Realtime-Su(var)3-9-R                   | 5'-GGCTTTGACCACCGTGGATTT-3'       |
| dCAF-1-p180-RT-F                        | 5'-ATGTTCAAGTGATAGATTAC-3'        |
| dCAF-1-p180-RT-R                        | 5'-TCGTAGTCGAAGAGCACCTT-3'        |
| actin RT-F                              | 5'-CGTGACTAACTGGGACGACA-3'        |
| actin RT-R                              | 5'-GGAGGCGTAGAGAGAAAGCA-3'        |
| rp49 RT-F                               | 5'-AGATCGTGAAGAAGCGCACCAAG-3'     |
| rp49 RT-R                               | 5'-CACCAGGAACTTCTTGAATCCGG-3'     |
| <b>Semi-quantitative RT-PCR primers</b> |                                   |
| Su(var)2-5-RT-Forward                   | 5'-GCAAGGGAAAGGTGGAGTA-3'         |
| Su(var)2-5-RT-Reverse                   | 5'-CCAGGATAGCGCTCTTC-3'           |
| Su(var)3-9-RT-Forward                   | 5'-CATCACAATCAAGCTGGAAC-3'        |
| Su(var)3-9-RT-Reverse                   | 5'-GATCTGCAGATTGAGTGGC-3'         |
