# Supplementary material for: DrosophilaCAF-1 regulates HP1-mediated epigenetic silencing and pericentric heterochromatin stability
Source: Oxford University Press journal article supplement (doi:10.1242/jcs.063610), 2010-07-28
Supplement: jcs063610tables3.pdf [file jcs063610tables3.pdf]

**Table S3. *Drosophila* CAF-1 p180 mutation suppresses PEV in  $T(2;3)Sb^V$**

| Genotype                                     | <i>314/+; Sb<sup>v</sup>/+</i> | <i>CAF-1-p180<sup>270</sup>/+; Sb<sup>v</sup>/+</i> | <i>CAF-1-p180<sup>100</sup>/+; Sb<sup>v</sup>/+</i> | <i>CAF-1-p180<sup>270</sup>/+; pTARG-CAF-1-p180/+; Sb<sup>v</sup>/+</i> |
|----------------------------------------------|--------------------------------|-----------------------------------------------------|-----------------------------------------------------|-------------------------------------------------------------------------|
| Average number of wild-type bristles per fly | 5.47<br>(416/76)               | 1.96<br>(153/78)                                    | 2.15<br>(129/60)                                    | 4.48<br>(309/69)                                                        |

CAF-1 p180 mutant flies (*CAF-1 p180<sup>270</sup>* and *CAF-1 p180<sup>100</sup>*), the rescued flies (*CAF-1-p180<sup>270</sup>/FM7C; pTARG-CAF-1-p180*) and flies of the precise excision allele 314 (served as a control) were crossed with  $T(2;3)Sb^V$ . 14 defined big bristles on the notum and the scutellum were scored and categorized into wild-type or stubble bristles.
